# Supplementary material for: Monitoring the dynamics of hemeoxygenase-1 activation in head and neck cancer cells in real-time using plasmonically enhanced Raman spectroscopy
Source: PubMed Central journal article supplement — Chem Sci. 2019 Mar 22;10(18):4876–82. doi: 10.1039/c9sc00093c (PMC6520930; doi:10.1039/c9sc00093c), 2019-03-22
Supplement: SC-010-C9SC00093C-s001.pdf [file SC-010-C9SC00093C-s001.pdf]

## Electronic Supplementary Information (ESI)

### Monitoring the dynamics of hemoxygenase-1 activation in head and neck cancer cells in real-time using plasmonically enhanced Raman spectroscopy

Sajanlal R. Panikkanvalappil,<sup>‡</sup> Chakravarthy Garlapati,<sup>¶</sup> Nasrin Hooshmand,<sup>‡</sup> Ritu Aneja,<sup>¶</sup> and Mostafa A. El-Sayed<sup>‡\*</sup>

<sup>‡</sup>Laser Dynamics Laboratory, School of Chemistry and Biochemistry, Georgia Institute of Technology, Atlanta, Georgia 30332, USA.

<sup>¶</sup>Georgia State University, Department of Biology, Atlanta, GA, USA.

#### Electronic Supplementary Information 1

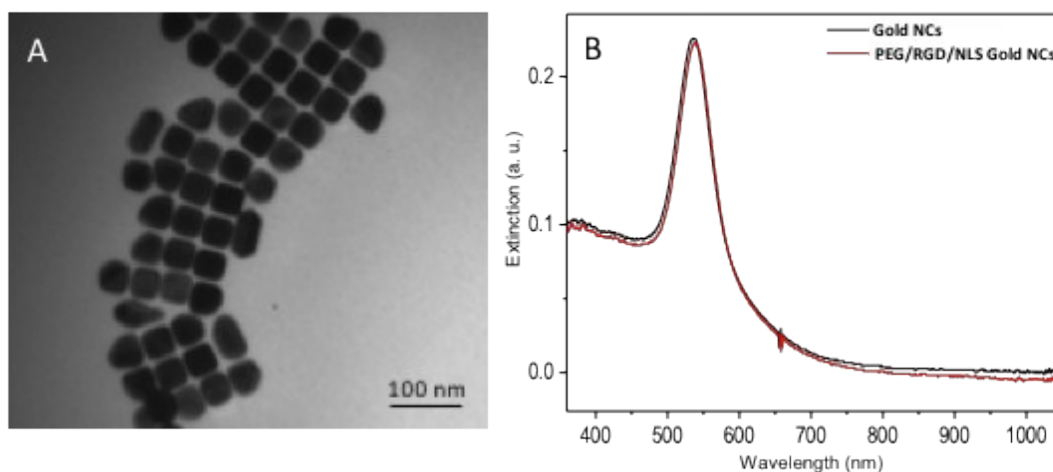

**Figure S1.** TEM image (A) and corresponding extinction spectra (B) of gold NCs before and after conjugation with PEG/RGD/NLS.

## Electronic Supplementary Information 2

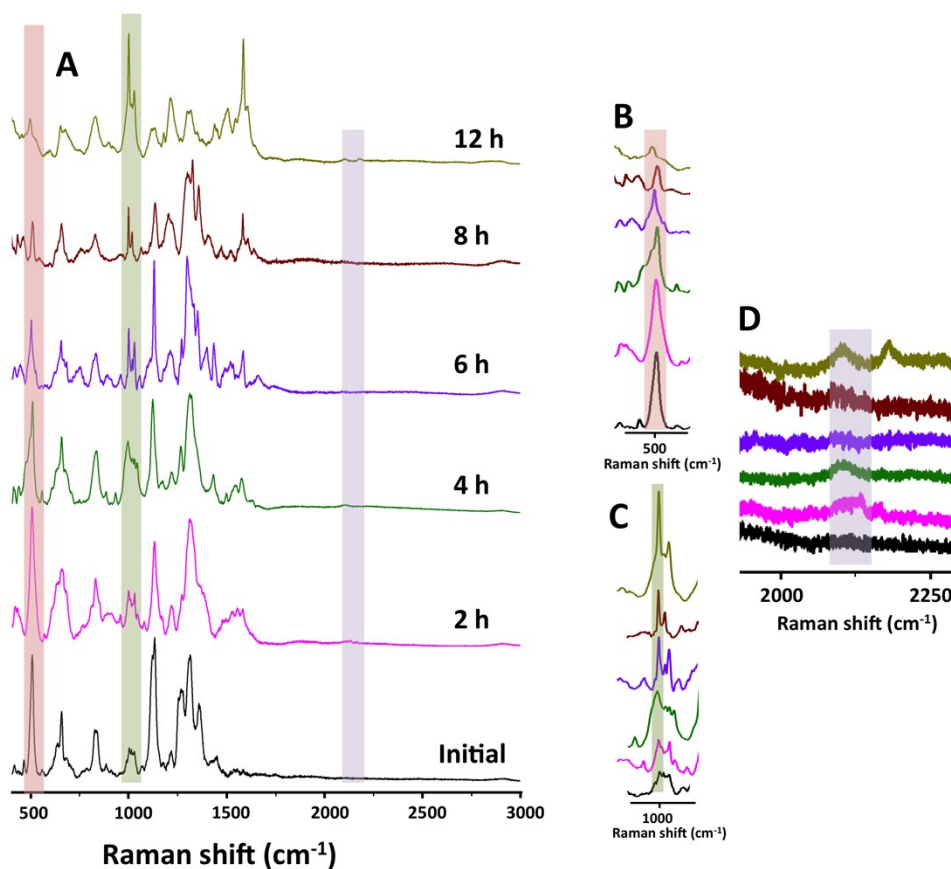

**Figure S2.** (A) Real-time PERS spectra taken from PEG/RGD/NLS/AuNCs internalized HSC-3 cells while being treated with cisplatin (75  $\mu\text{M}$ ). B, C and D are the enlarged views of the PERS spectra showing the disulfide vibration ( $\sim 502\text{ cm}^{-1}$ ), phenylalanine ring breathing vibration ( $1001\text{ cm}^{-1}$  in proteins and carbonyl vibration ( $\sim 2115\text{ cm}^{-1}$ ) in CO, respectively.

### Electronic Supplementary Information 3

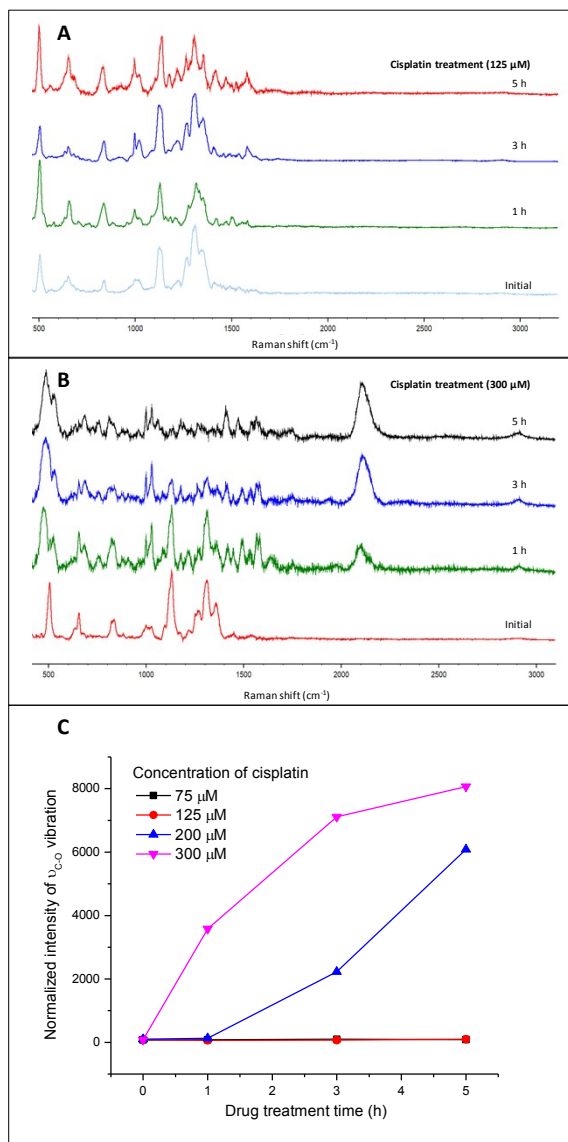

**Figure S3.** Real-time PERS spectra taken from PEG/RGD/NLS/AuNCs internalized HSC-3 cells while being treated with cisplatin at concentrations (A) 125  $\mu\text{M}$  and (B) 300  $\mu\text{M}$ . (C) Plot showing the normalized intensity of vibration of C-O stretching vibration collected as function of drug treatment time at different drug concentrations.

## Electronic Supplementary Information 4

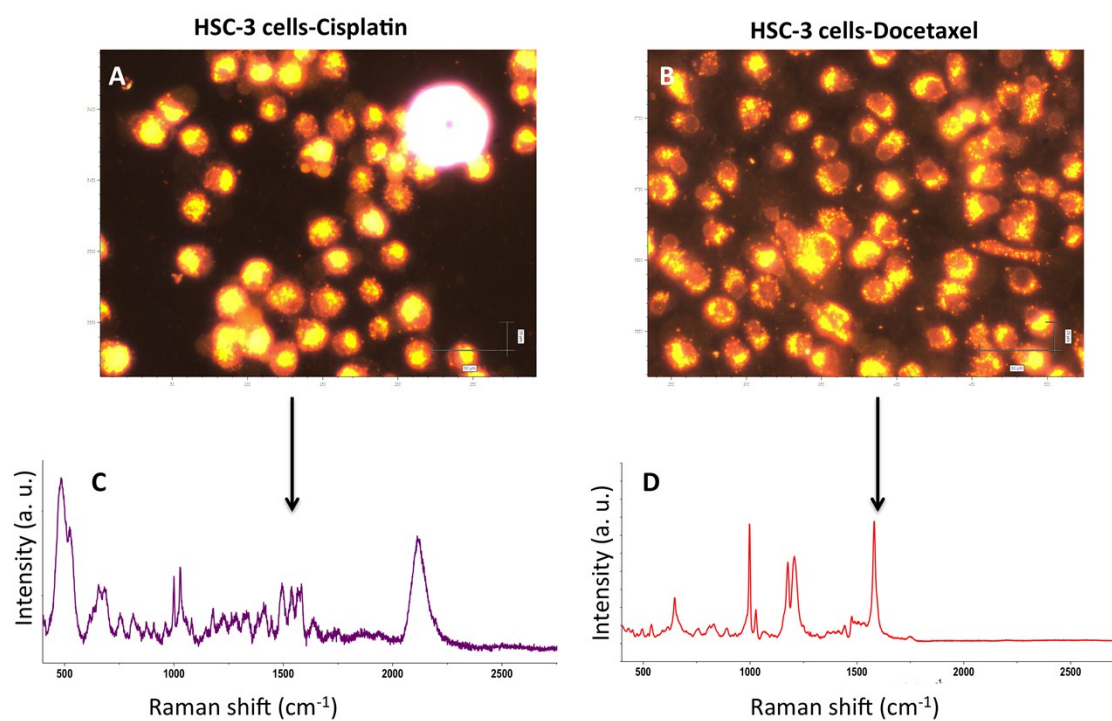

**Figure S4.** A and B are the dark field images of HSC-3 cells exposed to 200  $\mu\text{M}$  of cisplatin and docetaxel drugs, respectively. C and D are the PERS spectra collected from the HSC-3 cells after 4 h treatment of cisplatin and docetaxel respectively.

## Electronic Supplementary Information 5

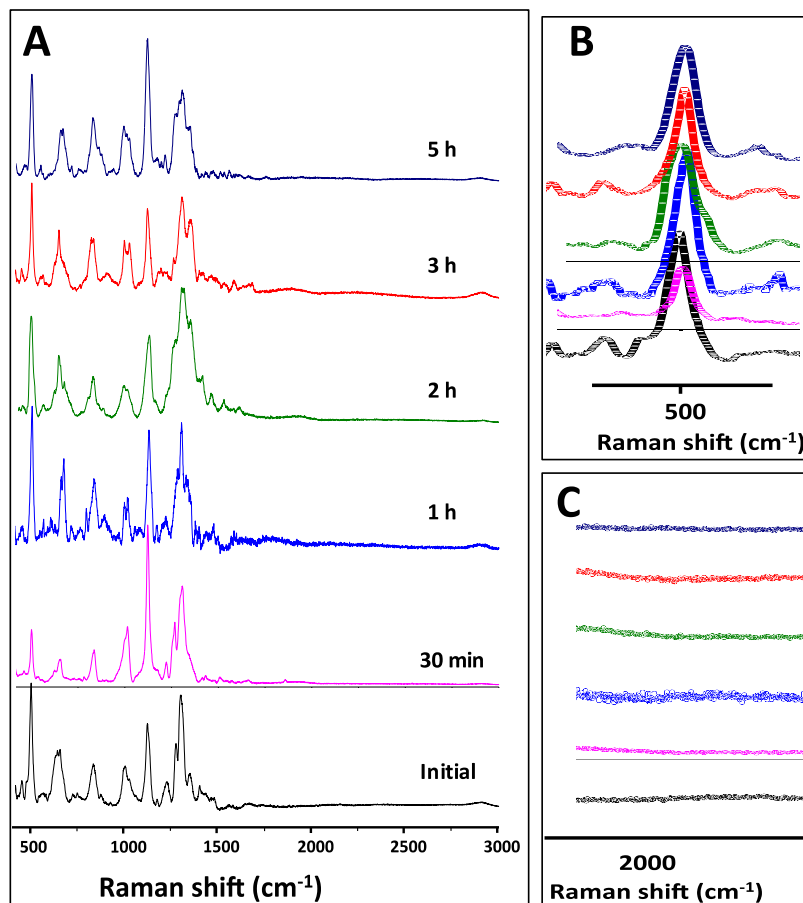

**Figure S5.** (A) Real-time PERS spectra taken from PEG/RGD/NLS/AuNCs internalized HSC-3 cells (no drug treatment). B and C are the enlarged views of the PERS spectra showing the disulfide vibration ( $\sim 502\text{ cm}^{-1}$ ) in proteins and carbonyl vibration region ( $\sim 2115\text{ cm}^{-1}$ ), respectively. Absence of distinct CO vibration indicates less HO-1 induction and activation under normal condition (no external stress).

## Electronic Supplementary Information 6

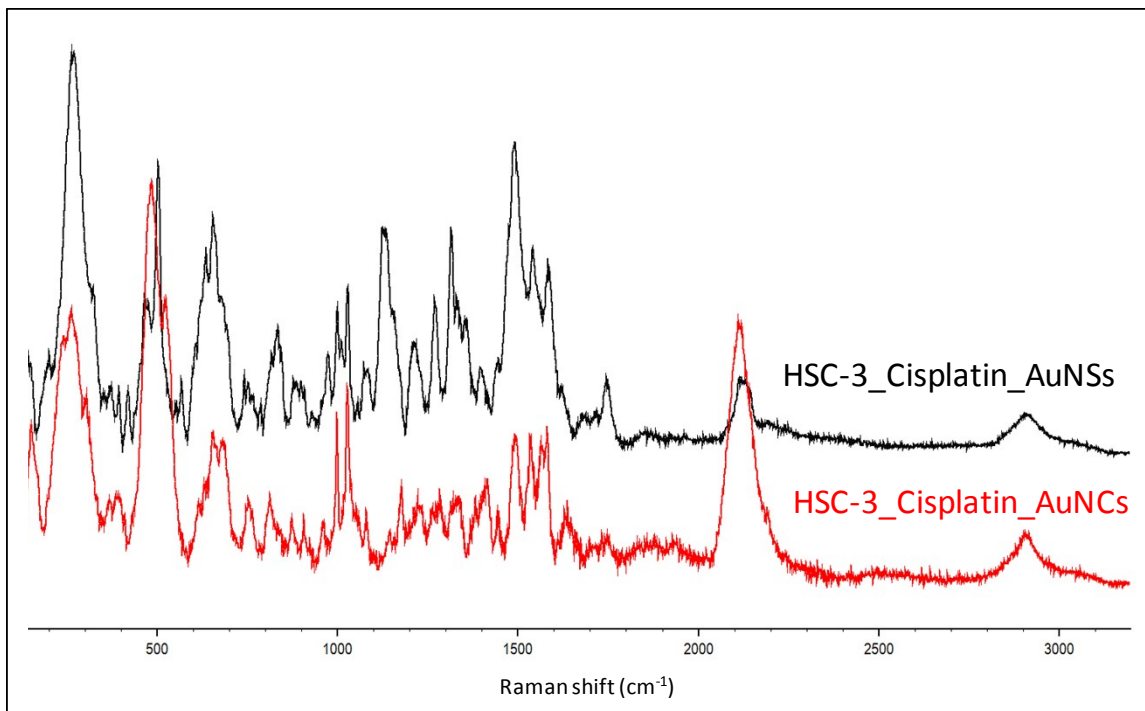

**Figure S6.** PERS spectra taken from PEG/RGD/NLS/AuNCs (red trace) and PEG/RGD/NLS/AuNSs (black trace) internalized HSC-3 cells after 5 h of cisplatin treatment (200  $\mu$ M).

## Electronic Supplementary Information 7

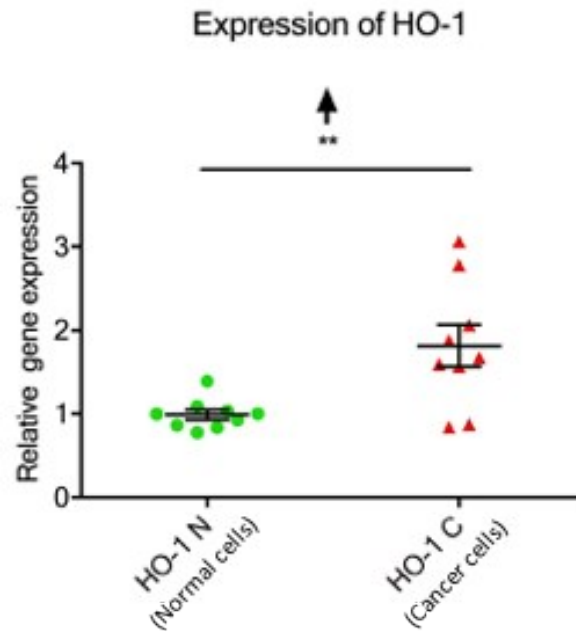

**Figure S7.** In silico analysis of HO-1 expression in head and neck normal (green) and head and neck cancer (red) cells was obtained using OncoPrint.
